# Supplementary material for: Captured cirrus ice particles in high definition
Source: Copernicus journal article supplement (doi:10.5194/acp-21-7171-2021), 2021-05-11
Supplement: Supplementary file 2 [file acp-21-7171-2021-supplement.zip]

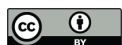

## *Supplement of*

## **Captured cirrus ice particles in high definition**

**Nathan Magee et al.**

*Correspondence to:* Nathan Magee (magee@tcnj.edu)

- acp-21-7171-2021-supplement-title-page.pdf
- Supplement #3-rev.pdf
- Supplement 1-OtherFlightImages.Rev.smaller.pdf
- Supplement 2-ICE-Ball.video.compressed.mp4

The copyright of individual parts of the supplement might differ from the article licence.
