# Supplementary material for: Captured cirrus ice particles in high definition
Source: Copernicus journal article supplement (doi:10.5194/acp-21-7171-2021), 2021-05-11
Supplement: Supplementary file 4 [file acp-21-7171-2021-supplement.zip]

Archive with 4 entries (4 files):
- Supplement #3-rev.pdf
- Supplement 1-OtherFlightImages.Rev.smaller.pdf
- Supplement 2-ICE-Ball.video.compressed.mp4
- acp-21-7171-2021-supplement-title-page.pdf
